# Supplementary material for: Growth Performance, Biochemical Composition and Nutrient Recovery Ability of Twelve Microalgae Consortia Isolated from Various Local Organic Wastes Grown on Nano-Filtered Pig Slurry
Source: MDPI journal article supplement (doi:10.3390/molecules27020422), 2022-01-10
Supplement: s1 [file s1]

**Supplementary material for:**

**Growth performance, biochemical composition and nutrients recovery ability of twelve microalgae consortia isolated from various local organic wastes grown on nano-filtered pig slurry**

Min Su<sup>1</sup>, Marta Dell'Orto<sup>1</sup>, Barbara Scaglia<sup>1</sup>, Giuliana D'Imporzano<sup>1</sup>, Alessia Bani<sup>2</sup> and Fabrizio Adani<sup>1,\*</sup>

Table S1. Organic wastes sampling and origin details

|     | Sample Name                     | Origin                           | Storage Mode   | Digestion Type | Location              | Plant/farm Scale                           | Plant Volume<br>m <sup>3</sup> | Sampling Temperature<br>°C | Ambient Temperature<br>°C |
|-----|---------------------------------|----------------------------------|----------------|----------------|-----------------------|--------------------------------------------|--------------------------------|----------------------------|---------------------------|
| S1  | Cow slurry                      | Cattle Stables                   | Open lagoon    | -              | Mantova               | 150 animals                                | -                              | 8                          | 4                         |
| S2  | Liquid digestate of cow slurry  | Biogas Plant                     | Open storage   | Mesophilic     | Suzzara               | 1 MW, 5 digesters                          | 12000                          | 15                         | 3.5                       |
| S3  | Solid digestate of cow slurry   | Biogas plant                     | Open storage   | Mesophilic     | Suzzara               | 1 MW, 5 digesters                          | 12000                          | 10                         | 3.5                       |
| S4  | Liquid digestate of cow slurry  | Biogas plant                     | Open storage   | Mesophilic     | Pegognaga             | 1 MW, 4 digesters                          | 10000                          | 20                         | 3                         |
| S5  | Cow slurry                      | Cattle Stables                   | Open lagoon    | -              | Pegognaga             | 100 animals                                | -                              | 9                          | 3                         |
| S6  | Solid digestate of cow slurry   | Biogas plant                     | Open storage   | Mesophilic     | Pegognaga             | 1 MW, 4 digesters                          | 10000                          | 10                         | 3                         |
| S7  | Cow slurry                      | Cattle stables                   | Open lagoon    | -              | Lodi                  | 400 animals                                | -                              | 10                         | 2                         |
| S8  | Digestate of cow slurry         | Cattle stables                   | Open storage   | Mesophilic     | Bologna               | -                                          | -                              | 15                         | 2                         |
| S9  | Wastewater                      | Urban wastewater treatment plant | Open lagoon    | -              | Peschiera Borromeo    | 5.2x10 <sup>5</sup> equivalent inhabitants | 154095 m <sup>2</sup>          | 10                         | 4                         |
| S10 | Digestate of OFMSW <sup>a</sup> | Biogas plant fed by OFMSW        | Open storage   | Thermophilic   | Lodi                  | 1 MW, 4 digesters                          | 8000                           | 20                         | 7                         |
| S11 | Liquid fraction of OFMSW        | Biogas plant fed by OFMSW        | Closed lagoon  | -              | Lodi                  | 1 MW, 4 digesters                          | 8000                           | 10                         | 7                         |
| S12 | OFMSW                           | Biogas plant fed by OFMSW        | Closed lagoon  | -              | Lodi                  | 1 MW, 4 digesters                          | 8000                           | 10                         | 7                         |
| S13 | Sewage Sludge                   | Biogas Plant                     | Open lagoon    | -              | Vellezzo Bellini (PV) | 1.6 MW, 3 digesters                        | 13500                          | 15                         | 8                         |
| S14 | Digestate of sewage sludge      | Biogas Plant                     | Closed storage | Thermophilic   | Vellezzo Bellini (PV) | 1.6 MW, 3 digesters                        | 13500                          | 20                         | 8                         |
| S15 | Cow slurry                      | Cattle stables                   | Open storage   | -              | Bologna               | -                                          | -                              | 8                          | 2                         |
| S16 | Cattle manure                   | Cattle stables                   | Open storage   | -              | Lodi                  | -                                          | -                              | 10                         | 5                         |

<sup>a</sup>OFMSW: Organic fraction of municipal solid wastes

Table S2. Amino acids compositions in ACs.

|                                            | AC_1 | AC_2 | AC_3 | AC_4 | AC_5 | AC_6 | AC_7 | AC_8 | AC_9 | AC_10 | AC_11 | AC_12 | WHO/FAO<br>[63] | Egg<br>[62] | Soybean<br>[62] | <i>Chlorella<br/>vulgaris</i><br>[62] |
|--------------------------------------------|------|------|------|------|------|------|------|------|------|-------|-------|-------|-----------------|-------------|-----------------|---------------------------------------|
| AA content (g 100 g <sup>-1</sup> protein) |      |      |      |      |      |      |      |      |      |       |       |       |                 |             |                 |                                       |
| cysteine                                   | 4.2  | 0.6  | 0.3  | 0.4  | 0.3  | 0.7  | 0.6  | 0.5  | 0.5  | 0.3   | 0.4   | 0.7   |                 | 2.3         | 1.9             | 1.4                                   |
| methionine <sup>a</sup>                    | 2    | 1.2  | 1.7  | 1.2  | 0    | 1.2  | 0.6  | 0.4  | 0.5  | 0.9   | 0.7   | 0.4   | 3.5             | 3.2         | 1.3             | 2.2                                   |
| tryptophana <sup>a</sup>                   | 0    | 0.4  | 1.6  | 1.3  | 1.9  | 1.3  | 0    | 0.5  | 2.3  | 1     | 0.6   | 2     | 1.0             | 1.7         | 1.4             | 2.1                                   |
| aspartic                                   | 14.5 | 19.1 | 14.1 | 15.3 | 15   | 21.1 | 17.2 | 22.7 | 23.9 | 16.5  | 25.2  | 19.3  | -               | 11.0        | 1.3             | 9.0                                   |
| glutamic                                   | 15.7 | 16.8 | 12.8 | 14.1 | 18.3 | 15.4 | 15.8 | 17.1 | 17.3 | 16.2  | 16.4  | 16.3  | -               | 12.6        | 19.0            | 11.6                                  |
| alanine                                    | 0    | 0    | 0    | 0.4  | 0.9  | 0    | 0    | 0    | 0    | 0     | 0     | 0     | -               | -           | 5.0             | 7.9                                   |
| arginine                                   | 21.2 | 21.9 | 21.9 | 19.2 | 20.3 | 20.2 | 23.7 | 20.1 | 17.2 | 23.1  | 17.6  | 21.5  | -               | 6.2         | 7.4             | 6.4                                   |
| glycine                                    | 7.5  | 5.9  | 9.6  | 6.4  | 5.7  | 6.3  | 9.1  | 6    | 5.7  | 9.2   | 5.9   | 5.8   | -               | 4.2         | 4.5             | 5.8                                   |
| isoleucine <sup>a</sup>                    | 1.3  | 1.6  | 1.2  | 1.2  | 1.5  | 1.8  | 1.2  | 1.5  | 1.5  | 1.3   | 1.5   | 1.9   | 4.0             | 6.6         | 5.3             | 3.8                                   |
| histidine <sup>a</sup>                     | 0.3  | 1.3  | 0    | 1.6  | 1.4  | 1.3  | 0    | 1.1  | 1.4  | 0.2   | 1.2   | 1.1   | -               | 2.6         | 2.4             | 2.0                                   |
| leucine <sup>a</sup>                       | 6.9  | 6.9  | 7.4  | 7.4  | 6    | 6.1  | 7    | 6    | 6    | 7.6   | 6.3   | 6.4   | 7.0             | 8.8         | 7.7             | 8.8                                   |
| lysine <sup>a</sup>                        | 4.1  | 3.7  | 5.6  | 7.9  | 8.5  | 4.3  | 3.8  | 4    | 4.7  | 3.4   | 4.2   | 4.1   | 5.5             | 5.3         | 6.4             | 8.4                                   |
| proline                                    | 9.4  | 3.2  | 7.6  | 5.5  | 3.4  | 2.8  | 6.2  | 2.7  | 2.5  | 6.8   | 2.7   | 2.8   | -               | 4.2         | 5.3             | 4.8                                   |
| serine                                     | 4.8  | 5.9  | 5.3  | 5.5  | 5.1  | 5.5  | 5    | 5.6  | 5.2  | 5     | 5.4   | 5.5   | -               | 6.9         | 5.8             | 4.1                                   |
| tyrosine                                   | 1.9  | 2.9  | 2.4  | 2.9  | 2.5  | 3    | 2.3  | 3    | 3.2  | 0.6   | 3.1   | 3     | -               | 4.2         | 3.7             | 3.4                                   |
| threonine <sup>a</sup>                     | 1.3  | 3.3  | 1.8  | 3.5  | 3.4  | 3.3  | 1.3  | 3.2  | 3.1  | 1.3   | 3.2   | 3.2   |                 | 5.0         | 4.0             | 4.8                                   |
| valine <sup>a</sup>                        | 1.7  | 2.2  | 1.9  | 2.5  | 2.7  | 2.2  | 1.7  | 2.2  | 2.2  | 1.8   | 2.2   | 2.4   | 5.0             | 7.2         | 5.3             | 5.5                                   |
| phenylalanine <sup>a</sup>                 | 3.4  | 3.2  | 4.8  | 3.7  | 3.2  | 3.5  | 4.5  | 3.3  | 2.8  | 4.9   | 3.3   | 3.7   | 6.0             | 5.8         | 5.0             | 5.5                                   |
| EEA %                                      | 20.9 | 23.8 | 26   | 30.3 | 28.5 | 25   | 20.1 | 22.2 | 24.5 | 22.5  | 23.2  | 25.1  | -               | -           | -               |                                       |

<sup>a</sup> Essential amino acids (EAAs)
